# Supplementary material for: Mutations in GDAP1 Influence Structure and Function of the Trans-Golgi Network
Source: PubMed Central journal article supplement (PMC7831947; doi:10.3390/ijms22020914), 2021-01-18
Supplement: ijms-22-00914-s001.pdf [file ijms-22-00914-s001.pdf]

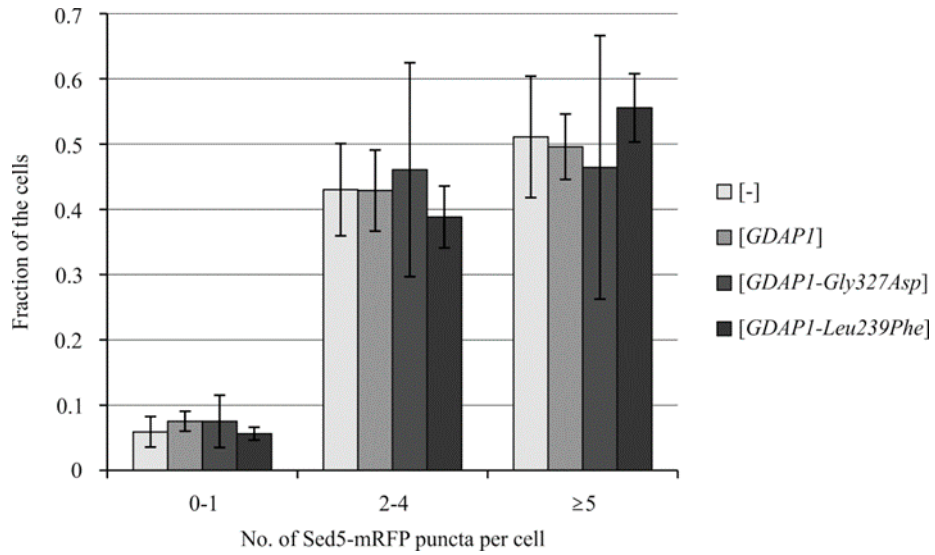

**Figure S1.** Expression of the *GDAP1* gene variants in yeast cells does not change the localization of the *cis*-Golgi protein Sed5. Yeast bearing the *SED5-mRFP*-containing plasmid (a marker of the *cis*-Golgi network) and indicated plasmids were prepared as in Figure 6. The number of Sed5-mRFP puncta in a single cell was determined. Error bars represent the standard deviation for three repeats.
